# Supplementary material
Source: MDPI journal article supplement (https://www.mdpi.com/1996-1073/15/7/2401)
Supplement: s1 [file s1]

## On-road and laboratory regulated and unregulated pollutants from three different plug-in hybrid vehicles – part 1: gaseous emissions

Tommaso Selleri\*, Anastasios D. Melas, Jacopo Franzetti, Christian Ferrarese, Barouch Giechaskiel, Ricardo Suarez-Bertoa\*

European Commission, Joint Research Centre (JRC), Ispra, Italy

\*Corresponding authors:

Tommaso.SELLERI@ec.europa.eu, Ricardo.SUAREZ-BERTO@ec.europa.eu

### Supplementary Information

#### 1. Tables

Table S1 – RDE route details for selected examples

|                           | <b>RDE</b> | <b>Motorway</b> |
|---------------------------|------------|-----------------|
| Total trip duration (min) | 103        | 117             |
| Total trip distance (km)  | 91.1       | 187.7           |
| Average speed (km/h)      | 52.8       | 95.6            |
| Average temperature (°C)  | 21.6       | 30.8            |
| Average rel. humidity (%) | 72.1       | 34.9            |
| Average altitude (m)      | 251.8      | 219.6           |
| Urban distance (km)       | 35.5       | 15.0            |
| Rural distance (km)       | 29.1       | 18.1            |
| Motorway distance (km)    | 26.5       | 154.6           |

Table S2 – List of performed experiments

|                                | <b>Vehicle #1</b>             | <b>Vehicle #2</b>            | <b>Vehicle #3</b>            |
|--------------------------------|-------------------------------|------------------------------|------------------------------|
| <i>Laboratory tests</i>        |                               |                              |                              |
| WLTP procedure @23°C (CD+CS)   | Yes                           | Yes                          | Yes                          |
| WLTP procedure @ -10°C (CD+CS) | Yes                           | Yes                          | Yes                          |
| WLTC test @ 40°C (CS)          | No                            | Yes                          | Yes                          |
| <i>On-road tests</i>           |                               |                              |                              |
| RDE route test                 | CD100, CD50*, CD25, CS, BatCh | CD100, CD50, CD25, CS, BatCh | CD100, CD50, CD25, CS, BatCh |

|                                                                                                                                                                                                                                                                                                                |        |                                       |    |
|----------------------------------------------------------------------------------------------------------------------------------------------------------------------------------------------------------------------------------------------------------------------------------------------------------------|--------|---------------------------------------|----|
| RDE route test – soak out                                                                                                                                                                                                                                                                                      | CD100* | No                                    | No |
| Motorway route test                                                                                                                                                                                                                                                                                            | CS     | CS (+FTIR for unregulated pollutants) | CS |
| <i>WLTP: Worldwide Harmonised Light-Duty Vehicles Test Procedure, CD: charge depleting, CS: charge sustaining, CDXX: charge depleting with initial SOC of high voltage battery equal to XX, BatCh: Battery charging mode, * user selectable mode equal to electric; in all other cases is the default one.</i> |        |                                       |    |

Table S3 – Tested vehicles

| Vehicle ID                                                                                                              | Vehicle #1           | Vehicle #2            | Vehicle #3           |
|-------------------------------------------------------------------------------------------------------------------------|----------------------|-----------------------|----------------------|
| Fuel                                                                                                                    | Gasoline             | Gasoline              | Gasoline             |
| Traction                                                                                                                | ICE + Electric Motor | ICE + Electric Motor  | ICE + Electric Motor |
| Injection                                                                                                               | DI                   | DI                    | DI                   |
| Emission control system                                                                                                 | TWC + GPF            | TWC + GPF             | TWC + GPF            |
| Registration                                                                                                            | 2020                 | 2020                  | 2020                 |
| Mileage (km)                                                                                                            | 3092                 | 2977                  | 14360                |
| Euro standard                                                                                                           | Euro 6d-ISC          | Euro 6d-TEMP-EVAP-ISC | Euro 6d-ISC          |
| ICE size (cm <sup>3</sup> )                                                                                             | 1598                 | 1499                  | 1598                 |
| Electric range (km)                                                                                                     | 61                   | 52                    | 61                   |
| <i>ICE: internal combustion engine, DI: direct injection, TWC: three way catalyst, GPF: gasoline particulate filter</i> |                      |                       |                      |

Table S4 – Data summary

| VEHICLE #1 – On-road tests                                                                                                                     |                         |                                   |                   |             |                      |             |            |                         |
|------------------------------------------------------------------------------------------------------------------------------------------------|-------------------------|-----------------------------------|-------------------|-------------|----------------------|-------------|------------|-------------------------|
| Route                                                                                                                                          | Conditions @ test start | Average T <sub>ambient</sub> (°C) | Mode of operation | SOC @ start | User selectable mode | NOx (mg/km) | CO (mg/km) | CO <sub>2</sub> (mg/km) |
| RDE                                                                                                                                            | Cold                    | 14                                | CS                | 0%          | Default              | 15          | 219        | 170                     |
| RDE                                                                                                                                            | Cold                    | 11                                | CD                | 100%        | Default              | 7           | 172        | 96                      |
| Motorway                                                                                                                                       | Hot                     | 14                                | CS                | 0%          | Default              | 16          | 1173       | 190                     |
| RDE                                                                                                                                            | Cold                    | 8                                 | CD                | 100%        | Default              | 10          | 170        | 93                      |
| RDE                                                                                                                                            | Cold                    | 10                                | CD                | 100%        | Electric             | 18          | 242        | 156                     |
| RDE                                                                                                                                            | Cold                    | 15                                | CD                | 50%         | Electric             | 19          | 244        | 147                     |
| RDE                                                                                                                                            | Cold                    | 14                                | CD                | 100%        | Default              | 21          | 285        | 151                     |
| RDE                                                                                                                                            | Cold                    | 11                                | CD                | 25%         | Default              | 17          | 287        | 159                     |
| RDE                                                                                                                                            | Cold                    | 5                                 | CD                | 100%        | Default              | 16          | 200        | 101                     |
| RDE                                                                                                                                            | Hot                     | 10                                | CS                | 0%          | Battery charging     | 16          | 603        | 315                     |
| RDE (soak out)                                                                                                                                 | Cold                    | 3                                 | CD                | 100%        | Electric             | 9           | 287        | 114                     |
| RDE                                                                                                                                            | Hot                     | 10                                | CS                | 0%          | Battery charging     | 17          | 515        | 308                     |
| RDE, motorway as defined in experimental section and Table S1, CD: charge depleting, CS: charge sustaining, SOC: state of charge of HV battery |                         |                                   |                   |             |                      |             |            |                         |

VEHICLE #2 – On-road tests

| Route                                                                                                                                          | Conditions @ test start | Average T <sub>ambient</sub> (°C) | Mode of operation | SOC @ start | User selectable mode | NOx (mg/km) | CO (mg/km) | CO <sub>2</sub> (mg/km) |
|------------------------------------------------------------------------------------------------------------------------------------------------|-------------------------|-----------------------------------|-------------------|-------------|----------------------|-------------|------------|-------------------------|
| RDE                                                                                                                                            | Cold                    | 27                                | CD                | 100%        | Default              | 12          | 88         | 107                     |
| RDE                                                                                                                                            | Hot                     | 31                                | CD                | 25%         | Default              | 23          | 174        | 179                     |
| RDE                                                                                                                                            | Cold                    | 25                                | CD                | 100%        | Default              | 14          | 247        | 104                     |
| Motorway                                                                                                                                       | Hot                     | 31                                | CS                | 0%          | Default              | 17          | 1091       | 209                     |
| RDE                                                                                                                                            | Hot                     | 31                                | CS                | 0%          | Battery charging     | 32          | 365        | 232                     |
| RDE                                                                                                                                            | Cold                    | 32                                | CD                | 50%         | Default              | 19          | 79         | 139                     |
| RDE                                                                                                                                            | Cold                    | 26                                | CS                | 0%          | Default              | 28          | 202        | 175                     |
| RDE                                                                                                                                            | Cold                    | 28                                | CS                | 0%          | Default              | 18          | 167        | 172                     |
| RDE                                                                                                                                            | Hot                     | 33                                | CS                | 0%          | Battery charging     | 26          | 310        | 256                     |
| RDE, motorway as defined in experimental section and Table S1, CD: charge depleting, CS: charge sustaining, SOC: state of charge of HV battery |                         |                                   |                   |             |                      |             |            |                         |

#### VEHICLE #3 – On-road tests

| Route                                                                                                                                          | Conditions @ test start | Average T <sub>ambient</sub> (°C) | Mode of operation | SOC @ start | User selectable mode | NOx (mg/km) | CO (mg/km) | CO <sub>2</sub> (mg/km) |
|------------------------------------------------------------------------------------------------------------------------------------------------|-------------------------|-----------------------------------|-------------------|-------------|----------------------|-------------|------------|-------------------------|
| ESP                                                                                                                                            | Cold                    | 20                                | CS                | 0%          | Default              | 15          | 349        | 205                     |
| ESP                                                                                                                                            | Cold                    | 20                                | CS                | 0%          | Default              | 15          | 312        | 208                     |
| ESP                                                                                                                                            | Hot                     | 28                                | CS                | 0%          | Battery charging     | 13          | 676        | 347                     |
| ESP                                                                                                                                            | Cold                    | 22                                | CD                | 100%        | Default              | 8           | 150        | 94                      |
| ESP                                                                                                                                            | Cold                    | 22                                | CD                | 100%        | Default              | 11          | 210        | 78                      |
| ESP                                                                                                                                            | Hot                     | 25                                | CD                | 25%         | Default              | 13          | 281        | 156                     |
| ESP                                                                                                                                            | Hot                     | 27                                | CD                | 50%         | Default              | 9           | 299        | 134                     |
| Motorway                                                                                                                                       | Hot                     | 27                                | CS                | 0%          | Default              | 23          | 2383       | 212                     |
| ESP                                                                                                                                            | Cold                    | 22                                | CS                | 0%          | Default              | 15          | 262        | 176                     |
| ESP                                                                                                                                            | Hot                     | 24                                | CS                | 0%          | Battery charging     | 13          | 465        | 297                     |
| RDE, motorway as defined in experimental section and Table S1, CD: charge depleting, CS: charge sustaining, SOC: state of charge of HV battery |                         |                                   |                   |             |                      |             |            |                         |

#### VEHICLE #1 – Laboratory tests

| Test type     | NOx (mg/km) | CO (mg/km) | THC (mg/km) | NMHC (mg/km) | CH <sub>4</sub> (mg/km) | NH <sub>3</sub> (mg/km) | <C <sub>5</sub> (mg/km) | C <sub>5</sub> (mg/km) | AHC (mg/km) |
|---------------|-------------|------------|-------------|--------------|-------------------------|-------------------------|-------------------------|------------------------|-------------|
| Tests @ 23°C  |             |            |             |              |                         |                         |                         |                        |             |
| WLTC CD3      | 13          | 178        | 18          | 4            | 1                       | 2                       | 1                       | 4                      | 2           |
| WLTC CD4      | 10          | 221        | 10          | 0            | n/a                     | n/a                     | n/a                     | n/a                    | n/a         |
| WLTC CS       | 25          | 332        | 8           | 7            | 1                       | 4                       | 1                       | 5                      | 2           |
| Weighted      | 5           | 67         | 4           | 1            | n/a                     | n/a                     | n/a                     | n/a                    | n/a         |
| Tests @ -10°C |             |            |             |              |                         |                         |                         |                        |             |
| WLTC CD1      | 15          | 440        | 60          | 42           | 4                       | 4                       | 6                       | 19                     | 10          |
| WLTC CS       | 12          | 740        | 54          | 48           | 5                       | 15                      | 8                       | 24                     | 12          |

RDE, motorway as defined in experimental section and Table S1, CD: charge depleting, CS: charge sustaining, SOC: state of charge of HV battery, THC: total hydrocarbons, NMHC: non-methane hydrocarbons, <C<sub>5</sub>: hydrocarbons with less than 5 carbon atoms, C<sub>5</sub>: hydrocarbons with 5 carbon atoms, AHC: aromatic hydrocarbons.

### VEHICLE #2 – Laboratory tests

| Test type     | NOx<br>(mg/km) | CO<br>(mg/km) | THC<br>(mg/km) | NMHC<br>(mg/km) | CH <sub>4</sub><br>(mg/km) | NH <sub>3</sub><br>(mg/km) | <C <sub>5</sub><br>(mg/km) | C <sub>5</sub><br>(mg/km) | AHC<br>(mg/km) |
|---------------|----------------|---------------|----------------|-----------------|----------------------------|----------------------------|----------------------------|---------------------------|----------------|
| Tests @ 23°C  |                |               |                |                 |                            |                            |                            |                           |                |
| WLTC CD3      | 15             | 380           | 13             | 12              | 1                          | 3                          | 1                          | 2                         | 2              |
| WLTC CD4      | 13             | 284           | 5              | 4               | n/a                        | n/a                        | n/a                        | n/a                       | n/a            |
| WLTC CS       | 11             | 333           | 12             | 10              | 1                          | 6                          | 1                          | 2                         | 1              |
| Weighted      | 3              | 95            | 3              | 3               | n/a                        | n/a                        | n/a                        | n/a                       | n/a            |
| Tests @ -10°C |                |               |                |                 |                            |                            |                            |                           |                |
| WLTC CD1      | 75             | 431           | 57             | 41              | 3                          | 12                         | 5                          | 13                        | 3              |
| WLTC CS       | 82             | 746           | 73             | 67              | 5                          | 21                         | 11                         | 19                        | 15             |
| Tests @ 40°C  |                |               |                |                 |                            |                            |                            |                           |                |
| WLTC CS       | 84             | 589           | 19             | 17              | 2                          | 4                          | 2                          | 2                         | 4              |

RDE, motorway as defined in experimental section and Table S1, CD: charge depleting, CS: charge sustaining, SOC: state of charge of HV battery, THC: total hydrocarbons, NMHC: non-methane hydrocarbons, <C<sub>5</sub>: hydrocarbons with less than 5 carbon atoms, C<sub>5</sub>: hydrocarbons with 5 carbon atoms, AHC: aromatic hydrocarbons.

### VEHICLE #3 – Laboratory tests

| Test type     | NOx<br>(mg/km) | CO<br>(mg/km) | THC<br>(mg/km) | NMHC<br>(mg/km) | CH <sub>4</sub><br>(mg/km) | NH <sub>3</sub><br>(mg/km) | <C <sub>5</sub><br>(mg/km) | C <sub>5</sub><br>(mg/km) | AHC<br>(mg/km) |
|---------------|----------------|---------------|----------------|-----------------|----------------------------|----------------------------|----------------------------|---------------------------|----------------|
| Tests @ 23°C  |                |               |                |                 |                            |                            |                            |                           |                |
| WLTC CD3      | 16             | 132           | 9              | 8               | 1                          | 1                          | 1                          | 0                         | 2              |
| WLTC CD4      | 16             | 161           | 1              | 1               | n/a                        | n/a                        | n/a                        | n/a                       | n/a            |
| WLTC CS       | 21             | 274           | 9              | 7               | 1                          | 2                          | 1                          | 2                         | 2              |
| Weighted      | 5              | 59            | 3              | 2               | n/a                        | n/a                        | n/a                        | n/a                       | n/a            |
| Tests @ -10°C |                |               |                |                 |                            |                            |                            |                           |                |
| WLTC CD1      | 5              | 380           | 63             | 58              | 4                          | 1                          | 7                          | 20                        | 13             |
| WLTC CS       | 18             | 880           | 59             | 53              | 6                          | 23                         | 8                          | 24                        | 16             |
| Tests @ 40°C  |                |               |                |                 |                            |                            |                            |                           |                |
| WLTC CS       | 14             | 433           | 8              | 6               | 1                          | 4                          | 1                          | 2                         | 2              |

RDE, motorway as defined in experimental section and Table S1, CD: charge depleting, CS: charge sustaining, SOC: state of charge of HV battery, THC: total hydrocarbons, NMHC: non-methane hydrocarbons, <C<sub>5</sub>: hydrocarbons with less than 5 carbon atoms, C<sub>5</sub>: hydrocarbons with 5 carbon atoms, AHC: aromatic hydrocarbons.

## 2. Figures

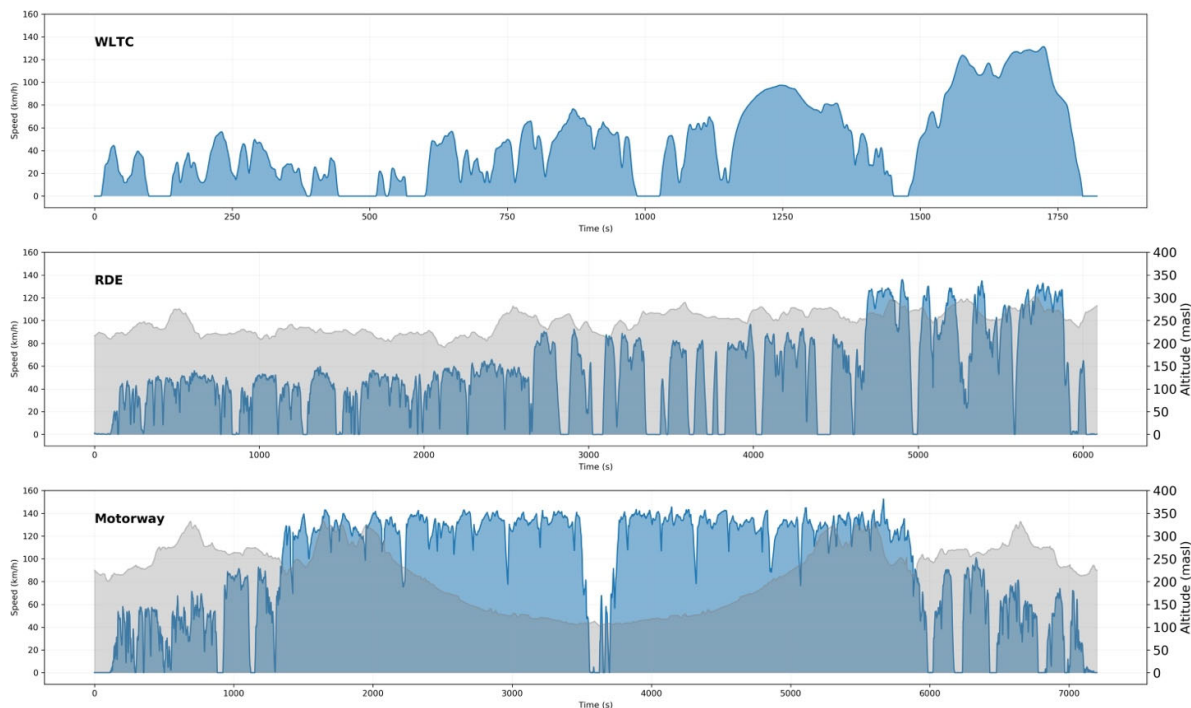

Figure S1 – Speed profiles for laboratory cycles. Examples of speed and altitude profiles for on-road routes

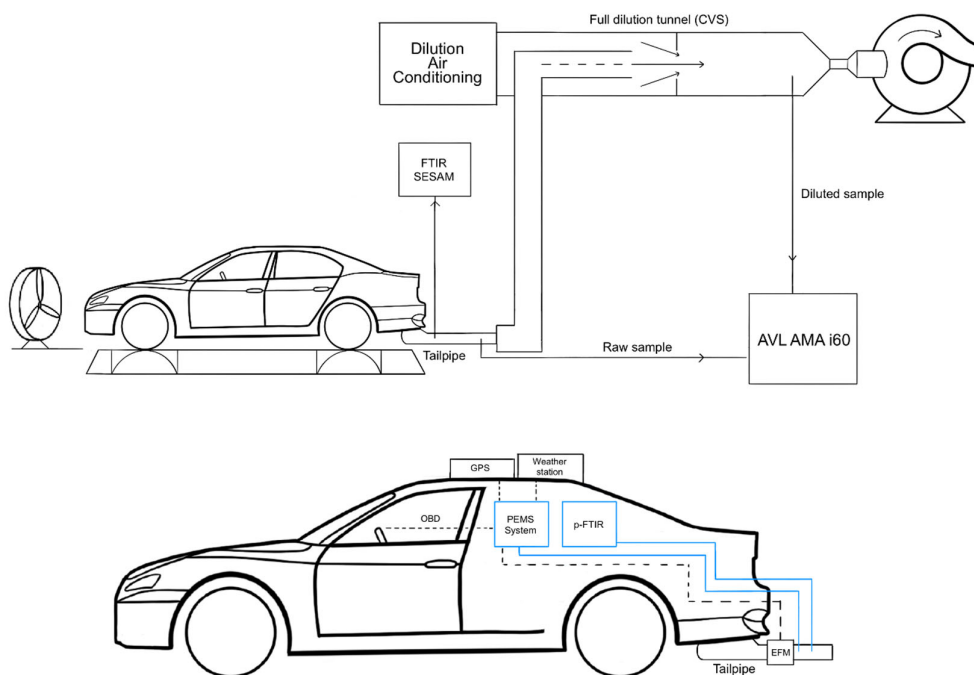

Figure S2 – Experimental set-up used during the tests performed at VELA 8 laboratory (top) and on-road (bottom)

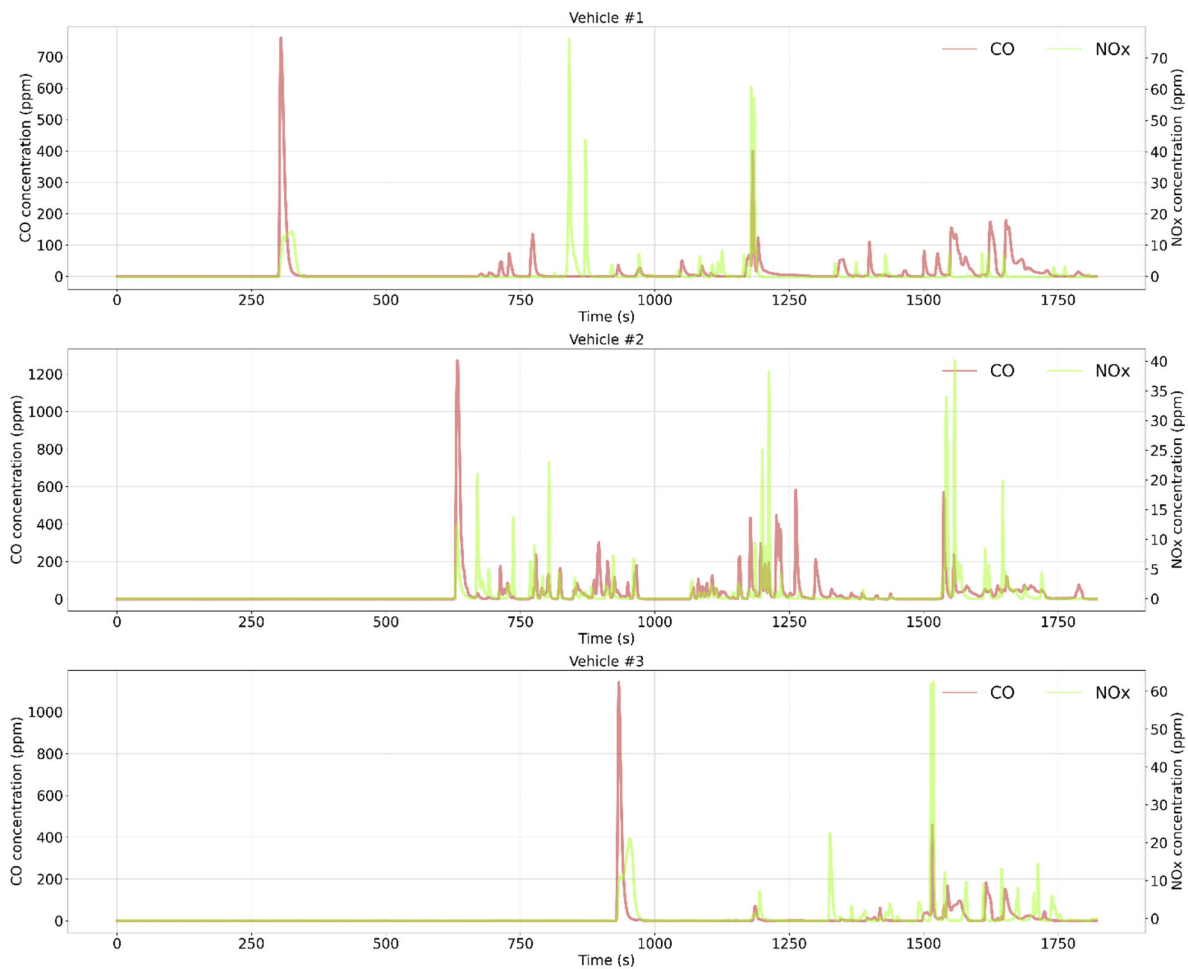

Figure S3 – Modal emissions on CD3 WLTC tests. CD3 indicates the third cycle in the charge depleting sequence (for all vehicles this was the cycle in which the ICE ignited for the first time), started with a battery initial State of Charge (SOC) equal to 100%. All tests were performed in the default user selectable mode.

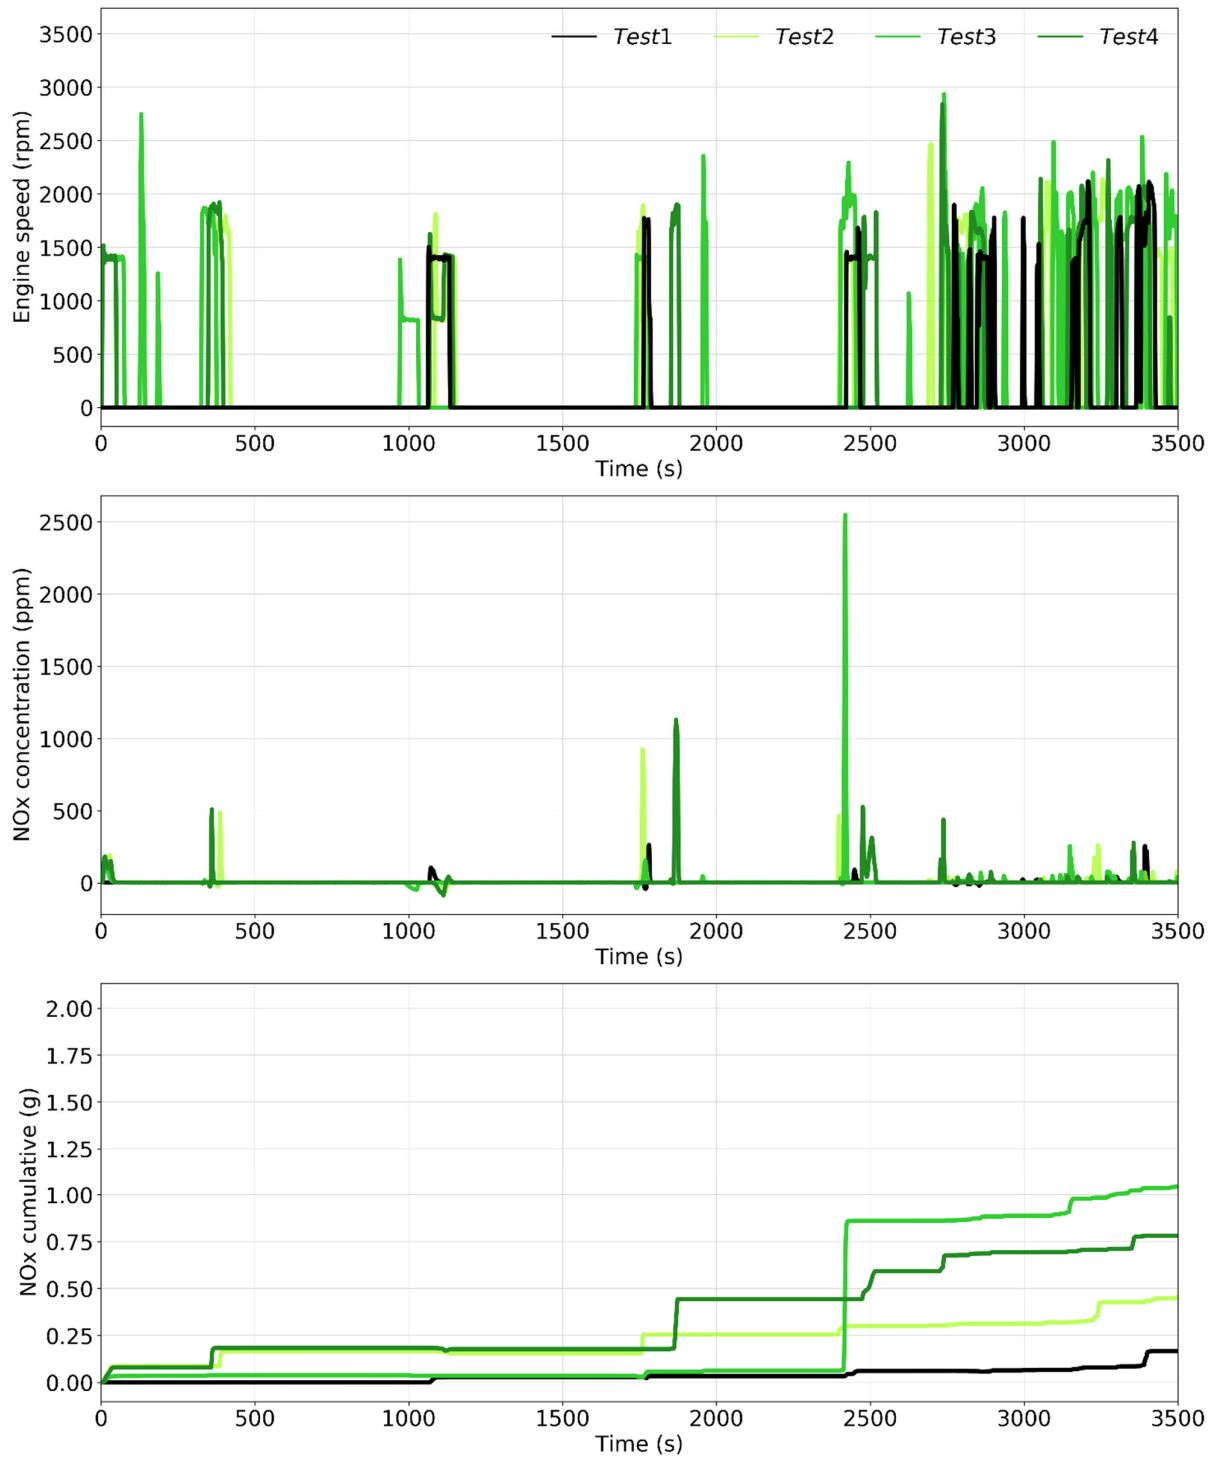

Figure S4 – Modal NOx emissions on the urban part of RDE compliant tests for vehicle #1. Tests were performed with a battery initial State of Charge (SOC) equal to 100%. All tests were performed in the default user selectable mode.

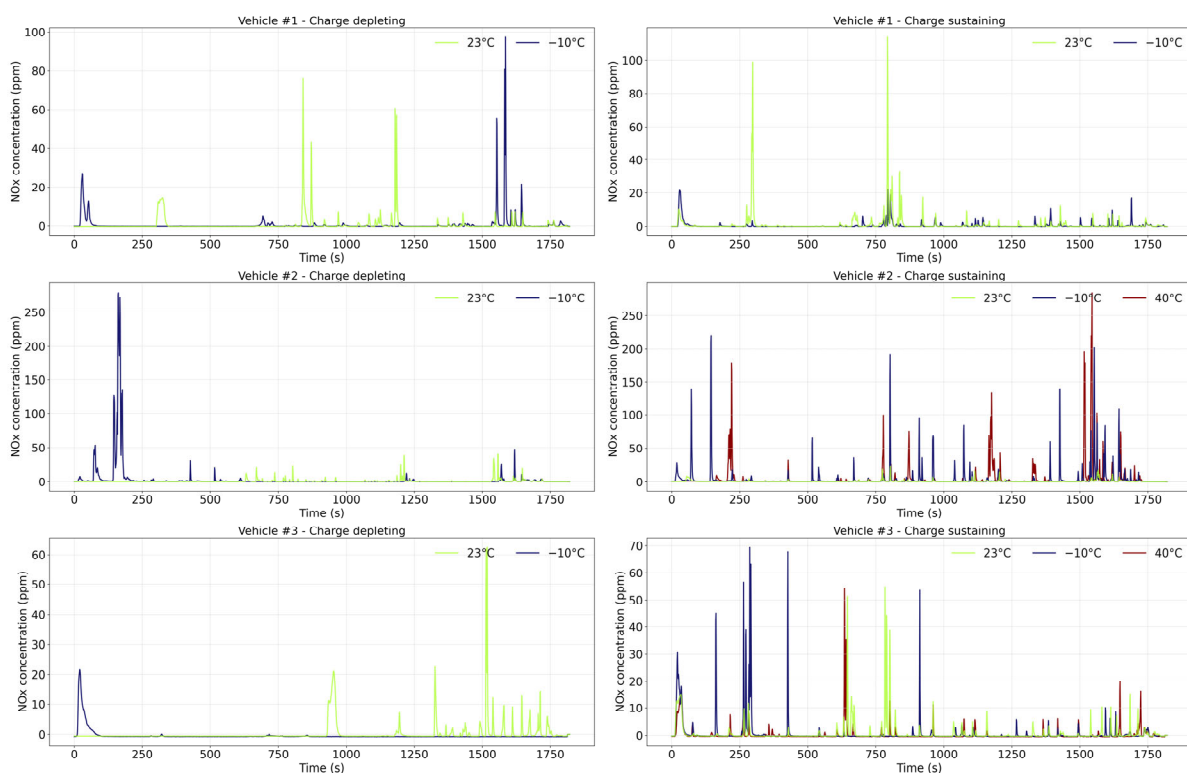

Figure S5 – Modal emissions on CD WLTC tests as a function of temperature. CD indicates the cycle in the charge depleting sequence, started with a battery initial State of Charge (SOC) equal to 100%, in which the internal combustion engine ignited for the first time (different depending on the test temperature but the same for all vehicles); CS indicates the charge sustaining cycle performed after the battery depleting sequence, i.e., starting with the minimum SOC. All tests were performed in the default user selectable mode.



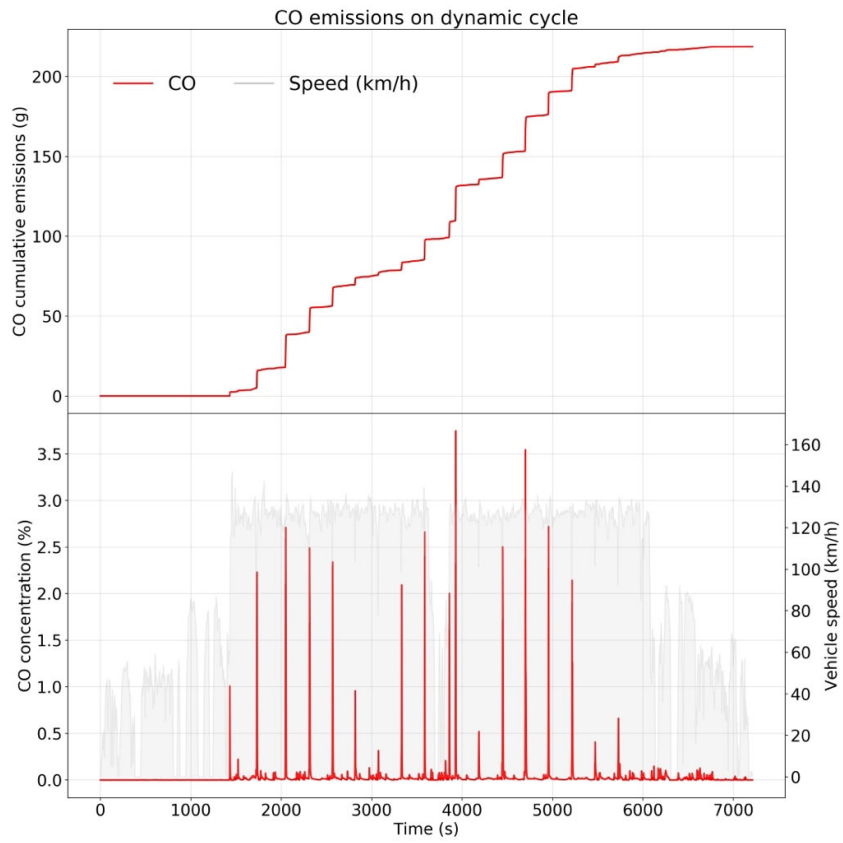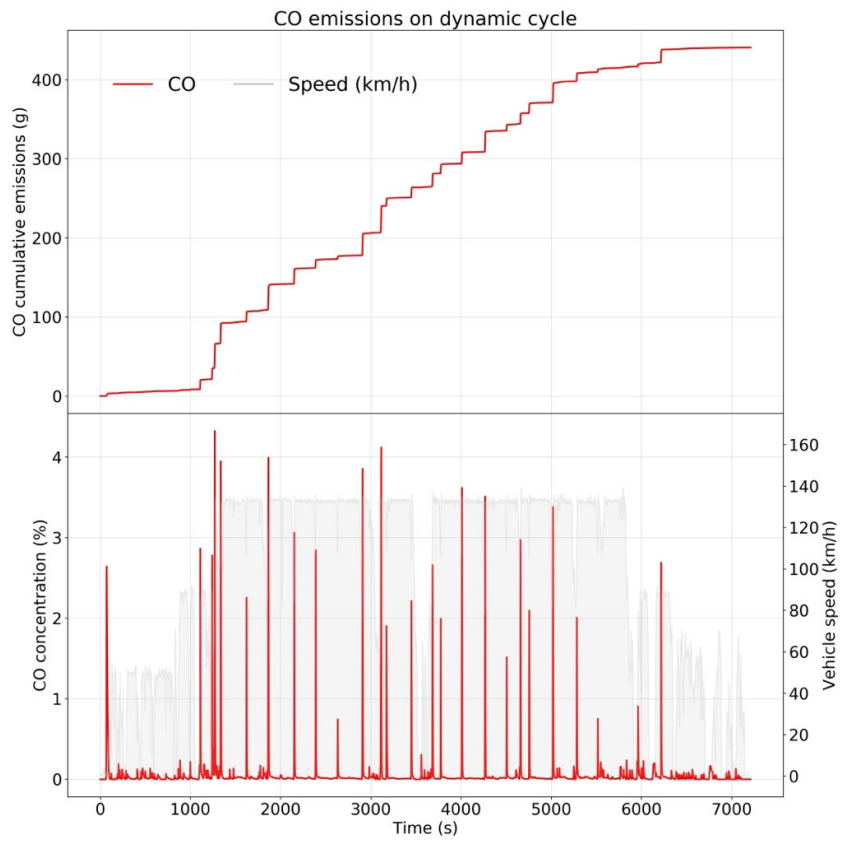

Figure S6 – CO on a dynamic motorway test on-road for the vehicle #1 (top figure) and vehicle #3 (bottom figure). The tests were performed with a depleted HV battery (minimum SOC) equal to the minimum. Upper panels in the figure report cumulated emissions of CO (red line). Lower panels reports instantaneous tailpipe concentrations of of CO (red line, measured with conventional PEMS) as well as the speed profile of the cycle (grey).

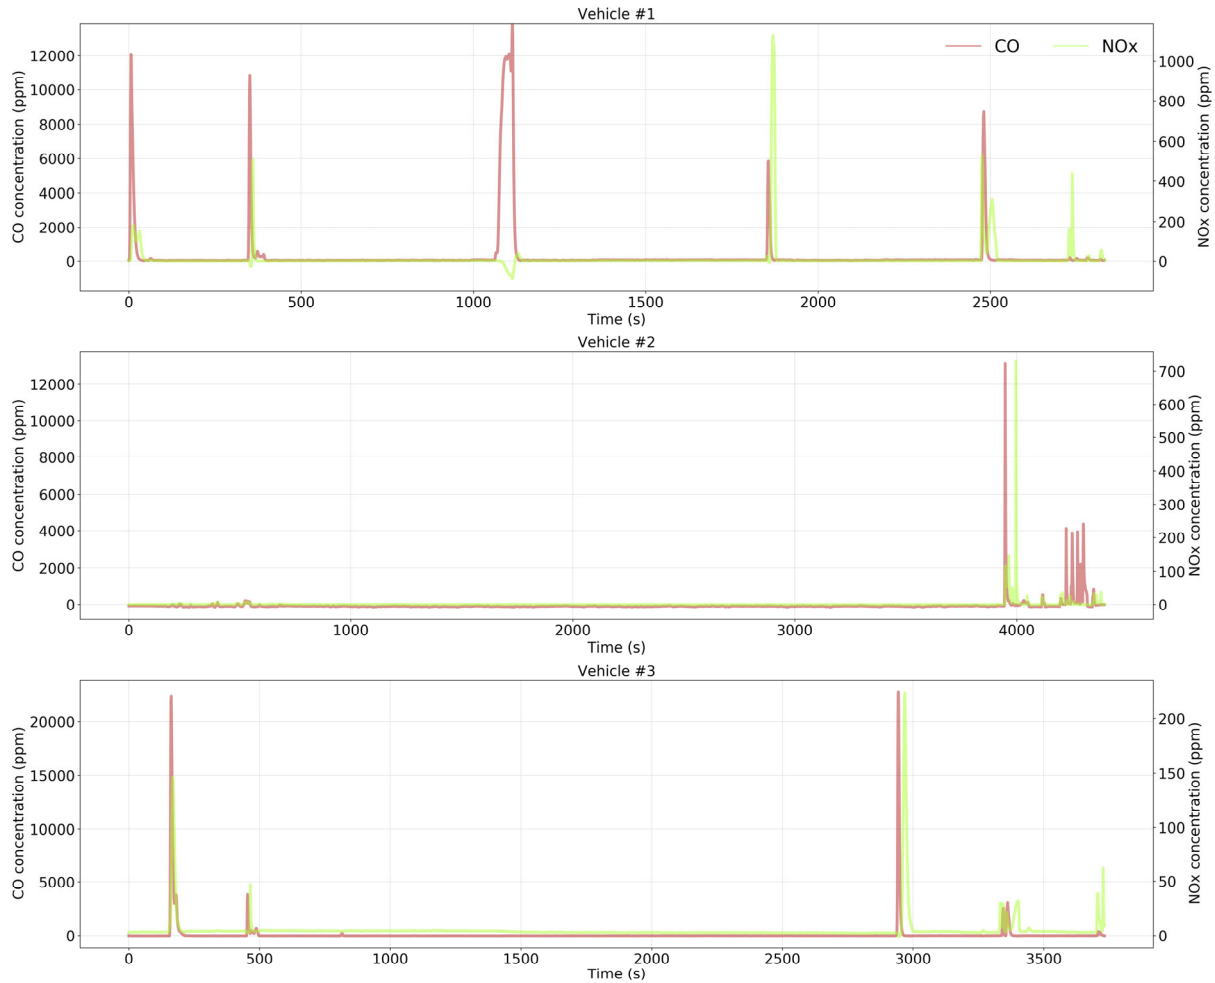

Figure S7 – CO and NOx modal emissions on RDE compliant CD100 test during the first cumulative 300 s of internal combustion engine operation, not necessarily consecutive. CD100 indicate charge depleting operation with battery initial State of Charge (SOC) equal to 100. All tests were performed in “hybrid” mode of operation.
